# Supplementary material for: Safe and Scalable Polyethylene Glycol-Assisted Hydrothermal Synthesis and Laser Cooling of 10%Yb3+:LiLuF4 Crystals
Source: MDPI journal article supplement (doi:10.3390/app12020774), 2022-01-13
Supplement: s1 [file s1]

Archive with 1 entries (1 files):
- applsci-1496025-supplementary.pdf
