# Supplementary material for: Safe and Scalable Polyethylene Glycol-Assisted Hydrothermal Synthesis and Laser Cooling of 10%Yb3+:LiLuF4 Crystals
Source: MDPI journal article supplement (doi:10.3390/app12020774), 2022-01-13
Supplement: s1 [file s1 › applsci-1496025-supplementary.pdf]

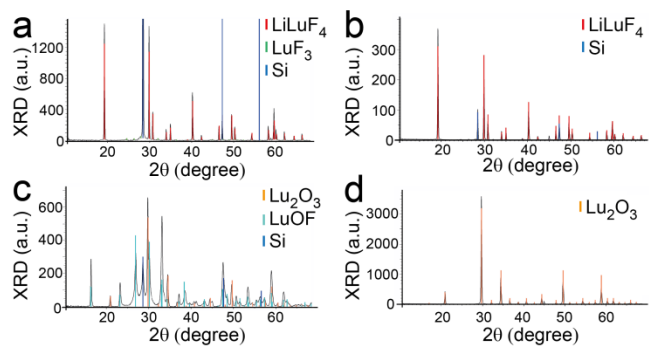

Figure S1. Powder XRD pattern of crystals following PEG-assisted hydrothermal synthesis at 220 °C for 2 h a) without calcination and calcination at: b) 300 °C, c) 500 °C, d) 600 °C.

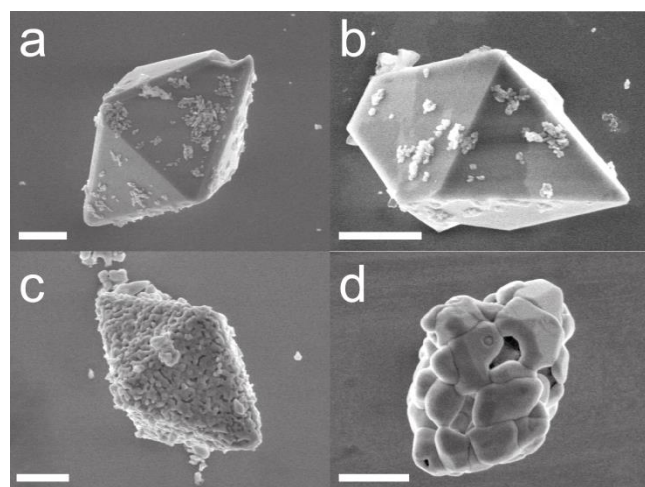

Figure S2. Scanning electron microscope images of crystals following PEG-assisted hydrothermal synthesis at 220 °C for 2 h a) without calcination and calcination at: b) 300 °C, c) 500 °C, d) 600 °C. Scale bar is 1  $\mu\text{m}$ .

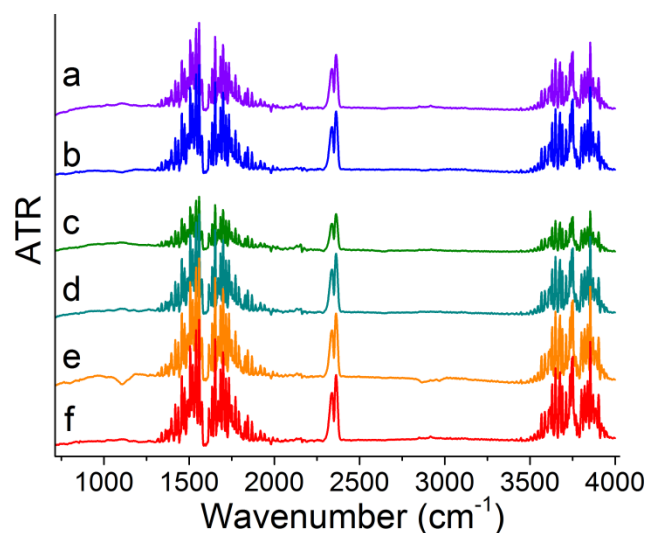

Figure S3. ATR-FTIR spectra of  $\text{Yb}^{3+}$ :LLF synthesized under following conditions: a) at 130 °C for 14 h; b) at 150 °C for 5 h; c) at 200 °C for 24 h; d) at 200 °C for 72 h; e) at 220 °C for 5 h; f) at 220 °C for 48 h.

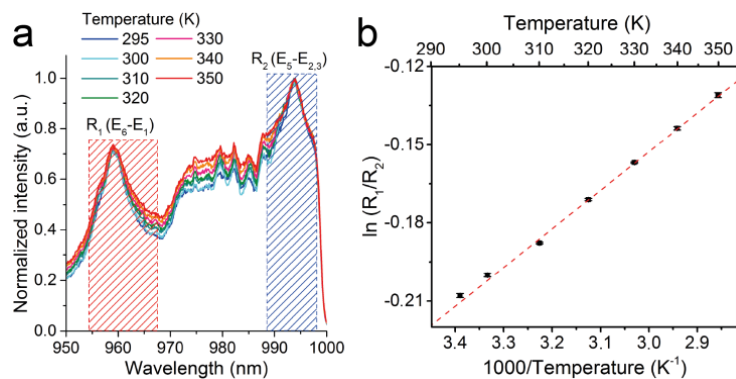

Figure S4. Temperature-calibrated PL spectra of Yb<sup>3+</sup>:LLF

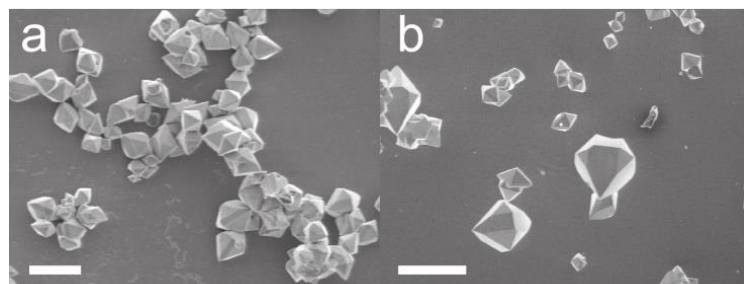

Figure S5. Scanning electron microscope images of LLF crystals following PEG-assisted hydrothermal synthesis at 200 °C for 24 h. a) RE nitrate precursor amount is 4 mmol. Scale bar is 5 μm. b) RE nitrate precursor amount is 16 mmol. Scale bar is 20 μm.

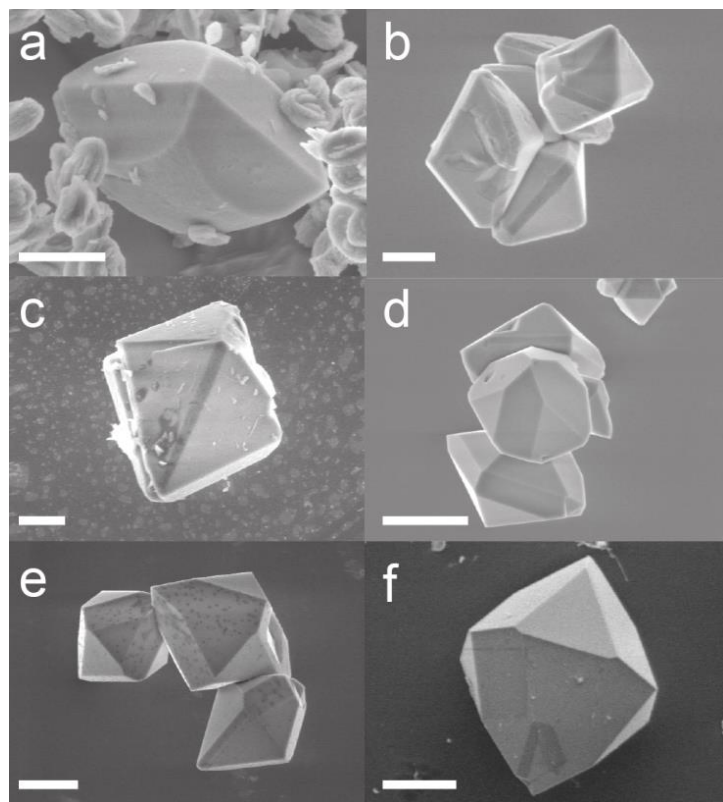

Figure S6. Scanning electron microscope images of crystals following PEG-assisted hydrothermal synthesis at: a) 100 °C (scale bar is 1 μm), b) 120 °C (scale bar is 1 μm), c) 130 °C (scale bar is 1 μm), d) 180 °C (scale bar is 2 μm), e) 200 °C (scale bar is 2 μm) and f) 220 °C (scale bar is 5 μm), for 24 h.

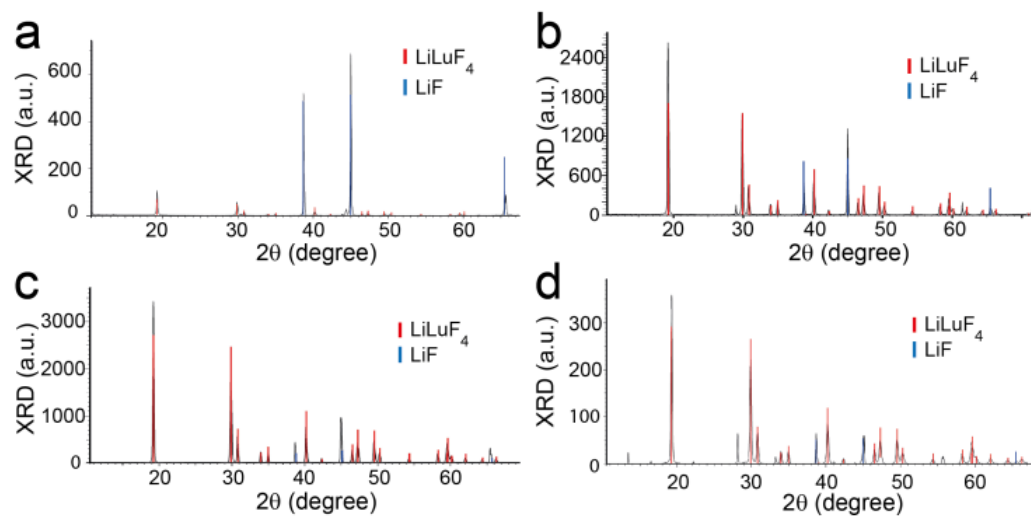

Figure S7. Powder XRD pattern of crystals following PEG-assisted hydrothermal synthesis at 130 °C for : a) 3 h, b) 5 h, c) 14 h, d) 24 h.

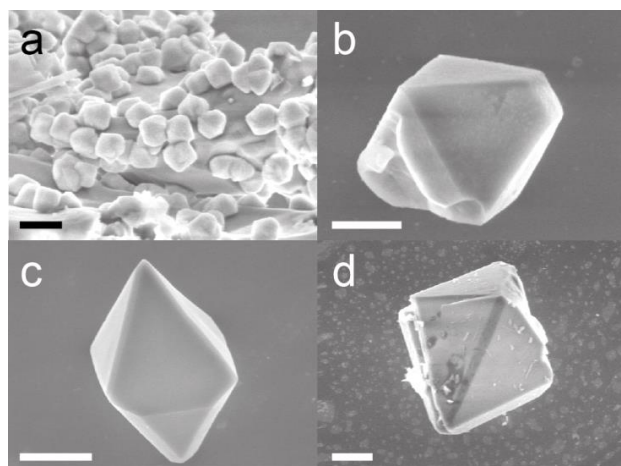

Figure S8. Scanning electron microscope images of crystals following PEG-assisted hydrothermal synthesis at 130 °C for: a) 3 h (scale bar is 1  $\mu$ m), b) 5 h (500 nm), c) 14 h (1  $\mu$ m), d) 24 h (1  $\mu$ m)
